# Supplementary material for: A simple one pot synthesis of cubic Cu5FeS4
Source: Royal Society of Chemistry journal article supplement (doi:10.1039/c4ra06939k), 2014-01-01
Supplement: c4ra06939k1.pdf [file c4ra06939k1.pdf]

**Electronic Supplementary Information**

**A simple one pot synthesis of cubic  $\text{Cu}_5\text{FeS}_4$**

**Prashant Kumar<sup>a</sup>, Meenakshi Gusain<sup>a</sup>, Pandian Senthil Kumar<sup>b</sup>, Sitharaman Uma<sup>a</sup> and  
Rajamani Nagarajan<sup>a\*</sup>**

<sup>a</sup>Materials Chemistry Group, Department of Chemistry, University of Delhi,  
Delhi 110007, India

<sup>b</sup>Department of Physics and Astrophysics, University of Delhi, Delhi 110007, India

*\*E-mail: [rnagarajan@chemistry.du.ac.in](mailto:rnagarajan@chemistry.du.ac.in)*

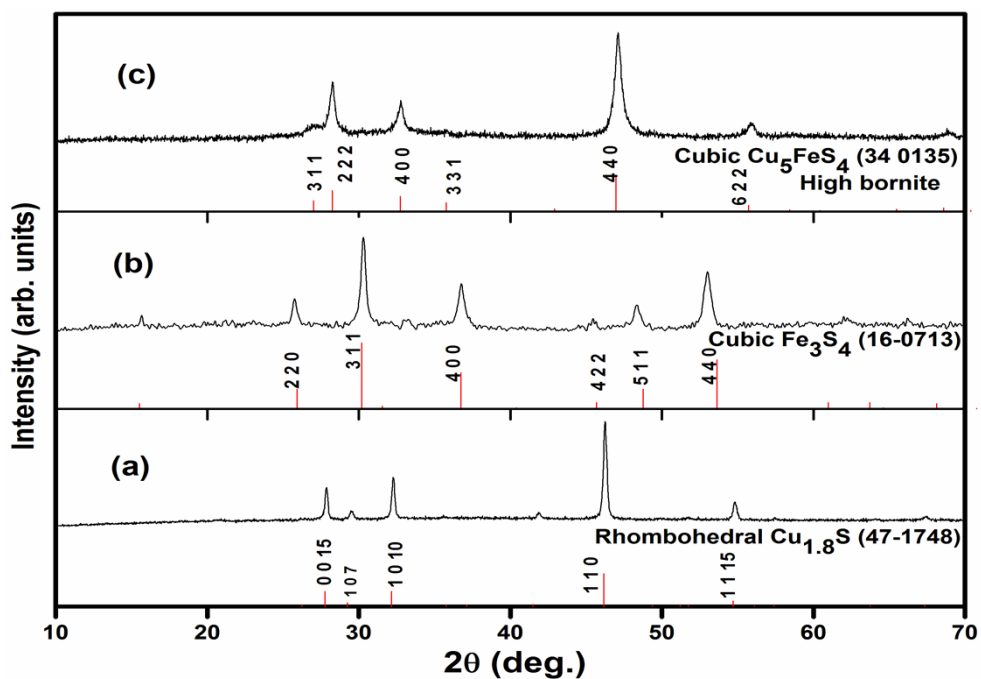

**Fig. S1** PXRD pattern of product obtained from refluxing (a) 0.50 g (5 mmol) of CuCl with 0.76 g (10 mmol) thiourea, (b) FeCl<sub>3</sub> with thiourea and (c) CuCl, FeCl<sub>3</sub> and thiourea. JCPDS Files of Cu<sub>1.8</sub>S, Fe<sub>3</sub>S<sub>4</sub> and cubic Cu<sub>5</sub>FeS<sub>4</sub> are provided for easy comparison.

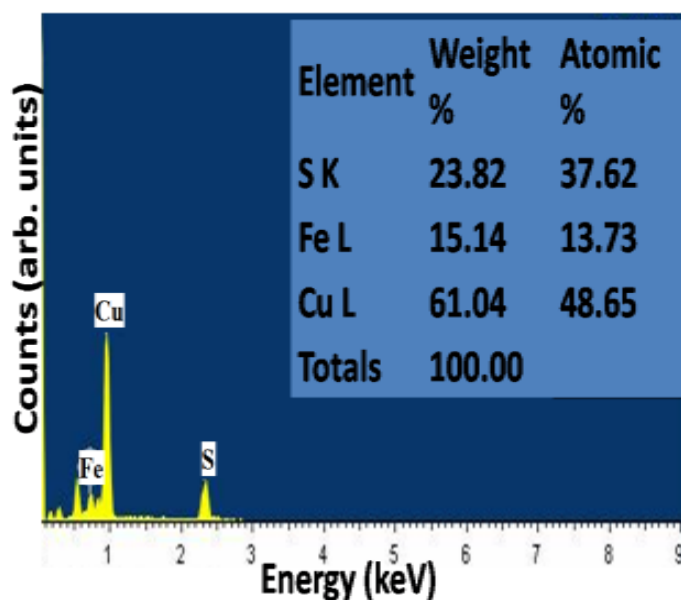

**Fig. S2** EDX spectrum along with the analysis of synthesized cubic Cu<sub>5</sub>FeS<sub>4</sub>.

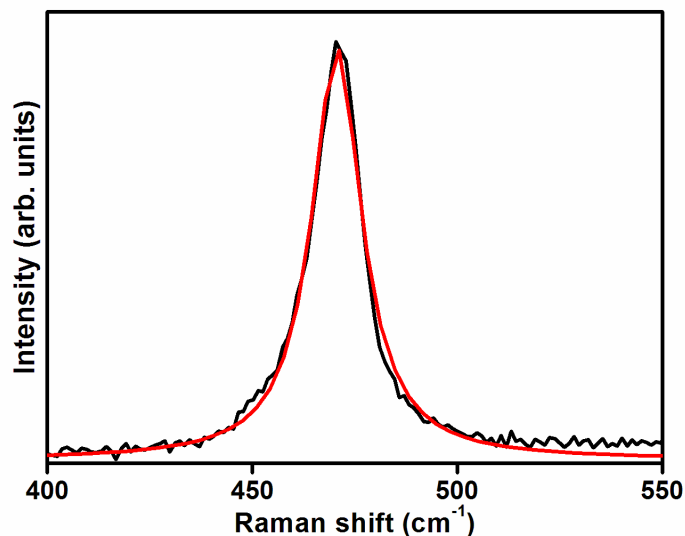

**Fig.S3** Room temperature Raman spectrum of  $\text{Cu}_9\text{S}_5$  ( $\text{Cu}_{1.8}\text{S}$ ) obtained by refluxing  $\text{CuCl}$  and thiourea in ethylene glycol.

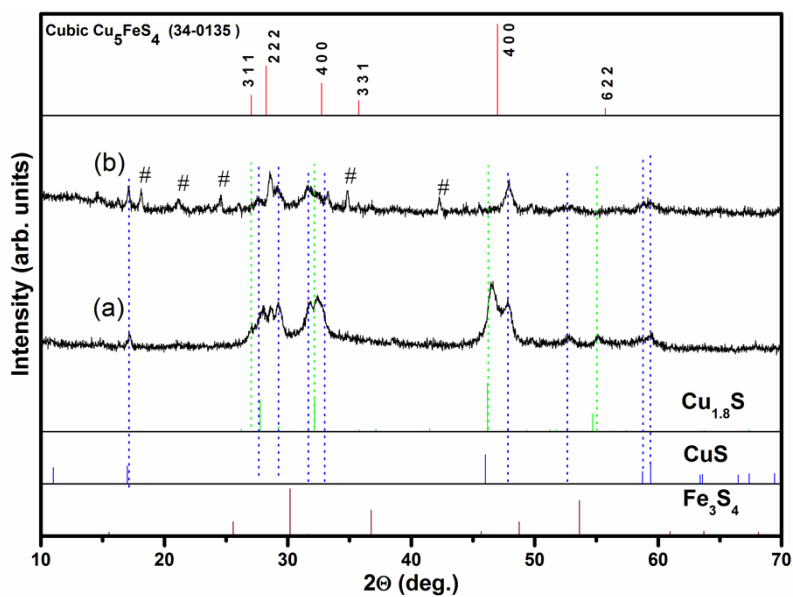

**Fig. S4** PXRD pattern of the product from the reaction of (a) 0.50 g (5 mmol)  $\text{CuCl}$ , 1.01 g (0.25 mmol) of  $\text{Fe}_2(\text{SO}_4)_3$  and 0.76 g (10 mmol) thiourea (b) 0.50 g (5 mmol)  $\text{CuCl}$ , 2.02 g (0.5 mmol) of  $\text{Fe}(\text{NO}_3)_3 \cdot 9\text{H}_2\text{O}$  and 0.76 g (10 mmol) thiourea in 100 mL of ethylene glycol for 1.5 h. JCPDS files of  $\text{Fe}_3\text{S}_4$ , hexagonal  $\text{CuS}$ ,  $\text{Cu}_9\text{S}_5$  ( $\text{Cu}_{1.8}\text{S}$ ) and cubic  $\text{Cu}_5\text{FeS}_4$ .

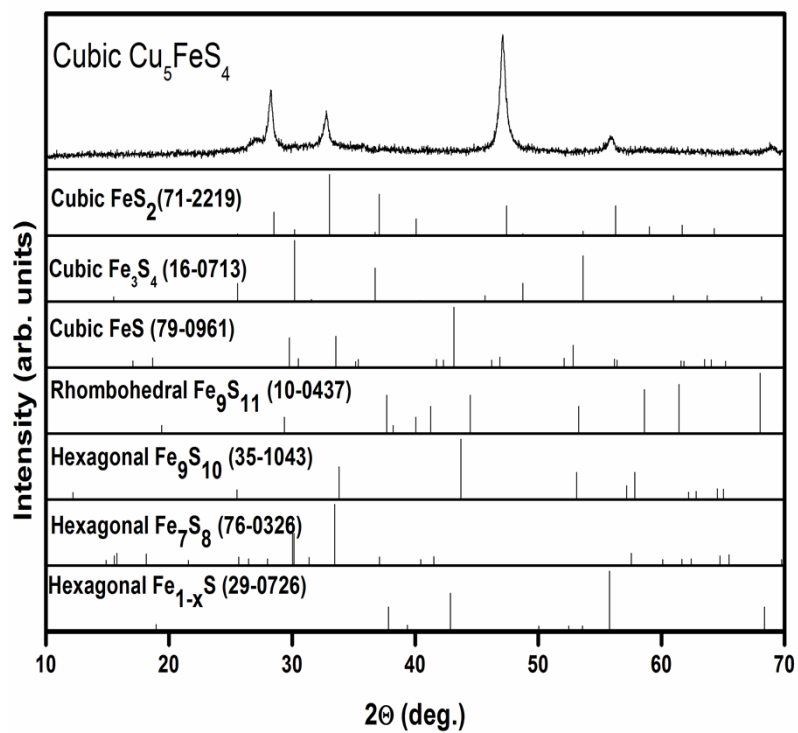

**Fig. S5** Comparison of the PXRD pattern of  $\text{Cu}_5\text{FeS}_4$  with the known iron sulphide compositions in higher symmetry.
